# Escape dynamics of free-ranging desert kangaroo rats (Rodentia: Heteromyidae) evading rattlesnake strikes

GRACE A. FREY MILLER<sup>1,2,\*</sup>, MALACHI D. WHITFORD<sup>1,3</sup>, TIMOTHY E. HIGHAM<sup>2</sup> and RULON W. CLARK<sup>1,4</sup>

<sup>1</sup>Department of Biology, San Diego State University, 5500 Campanile Drive, San Diego, CA 92182, USA

<sup>2</sup>Department of Evolution, Ecology, and Organismal Biology, University of California, Riverside, 900 University Avenue, Riverside, CA 92521, USA

<sup>3</sup>Graduate Group in Ecology, University of California, Davis, 1 Shields Avenue, Davis, CA 95616, USA

<sup>4</sup>Chiricahua Desert Museum, 4 Rattlesnake Canyon Road, Rodeo, NM 88056, USA

Received 10 September 2018; revised 15 February 2019; accepted for publication 15 February 2019

Many animals exhibit morphological specializations driven by the extreme selective pressure of predation, and understanding how such specializations shape escape behaviours can elucidate the evolutionary context of these morphologies. We examined the kinematics of the evasive leaps of desert kangaroo rats (*Dipodomys deserti*) during strikes from sidewinder rattlesnakes (*Crotalus cerastes*) to understand the potential importance of predator evasion in shaping bipedalism in desert rodents. We found that kangaroo rats escaping from snake strikes relied on rapid response times to initiate effective evasions. During jumps, their enlarged hindlimbs propelled vertical leaps that were multiple body lengths into the air, and these leaps were often accompanied by mid-air kicks and other manoeuvres that deterred snakes. Although we found high levels of variability in kinematic factors, all kangaroo rats that successfully evaded attacks escaped in a path away from the snake and thus did not have random/protean escape trajectories. In general, our findings support the idea that bipedalism, which has evolved independently in several desert rodent lineages, might be favoured because it allows for rapid and powerful vertical leaps that are crucial for avoiding ambush predators, such as vipers and owls.

ADDITIONAL KEYWORDS: biomechanics – bipedalism – ecological performance – escape trajectory – predator–prey interactions.

## INTRODUCTION

Physical performance inextricably links morphology and fitness. Performance is generally defined as the ability to execute an ecologically relevant act (Arnold, 1983) and is often used to characterize the locomotor abilities of animals as they either flee from a threat or pursue prey. Locomotor performance is often examined in the laboratory to control external factors; this context allows for detailed analyses of a few potentially influential variables, but comes at the cost of reduced ecological realism of the results (Irschick & Garland, 2001; Domenici *et al.*, 2011a, b). For example, sprinting is used in a variety of contexts, and sprint speed varies depending on whether the animal is fleeing from predators, chasing prey or simply moving

from one location to another (Irschick & Losos, 1998). Laboratory-based measurements of performance also frequently focus on ‘maximal performance’, and animals in their natural environments may only occasionally (or never) perform at maximal levels (Hertz *et al.*, 1988; Husak, 2006; Combes *et al.*, 2012; Wilson *et al.*, 2018). Trade-offs that are commonplace in nature may be lacking in controlled environments, such as high energetic costs of maximal performance (Taylor *et al.*, 1980) or speed–manoeuvrability trade-offs in complex habitats (Alexander, 1982; Wynn *et al.*, 2015), either of which may prevent animals from performing at maximal capacity in the wild. Alternatively, animals in natural environments may exhibit enhanced performance if they are motivated by factors that do not exist in the laboratory (Moore *et al.*, 2017b). Thus, although it is clear that quantification of some aspects of performance requires controlled

\*Corresponding author. E-mail: [gfreymil@gmail.com](mailto:gfreymil@gmail.com)

laboratory settings, measurement of performance in free-ranging animals can complement laboratory studies by providing a better understanding of the ecological relevance of the morphology and physiology underlying performance.

In situ measures of performance and kinematics (i.e. quantitative measure of motion) are particularly important for predator–prey interactions given the high costs for prey associated with predation and the motivation to perform maximally. The strong selective pressure to detect or avoid predators has produced some of the fastest sensory responses and motor actions in nature. These mechanisms often result from changes to morphology (Dayton *et al.*, 2005) and fine-tuning of physiological systems (Jacobs, 1995; Domenici & Blake, 1997). Therefore, the aspects of an organism's morphology that enhance performance are intimately linked to survival and fitness. For example, crucian carp (*Carassius carassius* Linnaeus) exhibit intraspecific variation in body shape, where the deep-bodied phenotype (elongated dorsoventrally) improves escape performance compared with the shallow-bodied phenotype (Domenici *et al.*, 2008). Instances such as this, where organisms are morphologically specialized for predator evasion, provide model systems to explore how performance links morphology to fitness.

Kangaroo rats (*Dipodomys* spp.) are an abundant and widespread radiation of bipedal rodents common throughout arid environments of North America, and they exhibit several specialized adaptations for avoiding predatory attacks. First, they have enlarged auditory bullae that allow them to hear low-frequency sounds often produced by the sudden attack of an ambush predator (e.g. rattlesnake striking or owl swooping), which is key in predator evasion (Webster, 1962; Webster & Webster, 1971). Second, their enlarged hindlimb muscles and thick tendons are important for withstanding high acceleration during the rapid and forceful jumps used to evade predator attacks (Biewener & Blickhan, 1988). Bipedality evolved four times independently within Rodentia (kangaroo rats, jerboas, springhares and jumping mice), presumably as an adaptation for vertical leaping and predator evasion (McGowan & Collins, 2018). Although there are some recent studies of how jerboa locomotion and predator evasion are influenced and driven by this unique morphology (Moore *et al.*, 2017a, b) and a series of studies exploring the sensory basis for predator avoidance in kangaroo rats (Webster, 1962; Webster & Webster, 1971), no field-based studies have quantitatively analysed the biomechanics of the forceful evasive jumps made by bipedal rodents leaping away from ambush predators.

The goals of this study were to examine how kangaroo rats avoid the rapid strike of rattlesnakes during natural encounters and quantify several aspects of

these evasions to gain a better understanding of how the specialized morphology of the kangaroo rat may underlie its extraordinary performance during predator evasion. Using three-dimensional high-speed videos, we analysed several key kinematic details of the evasive jumps used by free-ranging desert kangaroo rats (*Dipodomys deserti* Stephens) that successfully escaped rattlesnake (*Crotalus cerastes* Hallowell) strikes in order to determine how these leaps vary in natural conditions and provide new insights into predator evasion by bipedal rodents. We predicted that desert kangaroo rats would exhibit greater evasive jumping abilities compared with other small mammals. We also predicted that they would display truly protean (i.e. random) escape trajectories by occasionally escaping towards/over the snake because: (1) other rodents have been described as having protean escape paths (Domenici *et al.*, 2011b); and (2) escape trajectories should, in theory, be highly variable during rapid predator–prey interactions, such as those between rattlesnakes and their prey (Domenici *et al.*, 2011a). This study is an important next step towards understanding why bipedalism evolved convergently in desert rodents, because it elucidates how this morphology aids in avoiding ambush predators and provides information necessary to quantify the fitness consequences of high levels of performance.

## MATERIAL AND METHODS

### STUDY SITE

Our study took place on the southwestern side of the Barry M. Goldwater Range in Yuma, AZ, USA (32°22'13.508"N, 114°22'23.783"W), which is managed by the United States Marine Corps. The site is bisected by a dirt road, separating the site into two distinct habitats: wind-blown sand dunes to the west and creosote scrub (*Larrea tridentate* Coville) to the east (Malusa & Sundt, 2015). Data were collected from mid-May to early August in 2016. All interactions were recorded between sunset and sunrise, because both rattlesnakes and kangaroo rats are nocturnal at this time of year.

### STUDY ANIMALS

All procedures were approved by the San Diego State University Institutional Animal Care and Use Committee (APF 16-08-014C). We first located sidewinder rattlesnakes by following the distinct tracks they leave in the sand. Adults were captured and surgically implanted with temperature-sensitive radio transmitters following the methods of Reinert & Cundall (1982). While the snakes were anaesthetized for surgery, we measured mass to the nearest gram,

sex, snout–vent length, tail length, head length and width, and the width of each rattle segment, all to the nearest millimetre. Once normal activities were resumed, snakes were released at the site of capture.

Kangaroo rats were trapped using Sherman live traps baited with black oil sunflower seed placed adjacent to *D. deserti* burrow systems. We marked kangaroo rats with fingerling ear tags (National Band and Tag #1005-1) for long-term identification and a unique dye mark using Nyanzol fur dye for short-term identification. During the marking process, we recorded sex, mass to the nearest gram, and snout–anus length, tail length and hindfoot length, all to the nearest millimetre. All individuals were processed in the field and released immediately at the site of capture.

#### FILMING INTERACTIONS

We used a modified version of the methods used by Whitford *et al.* (2017) and Higham *et al.* (2017) to record natural interactions between free-ranging sidewinders and desert kangaroo rats. Rattlesnakes with transmitters were tracked at least once nightly via radio telemetry. When a telemetered snake was found hunting on the surface, we moved recording equipment to the snake's location. Two tethered high-speed cameras (Edgertronic, model SC1) recording at 500 Hz and four to six infrared lights were positioned ~3 m away from the ambushing snake. The cameras were connected to laptop computers via 30.5 m Ethernet cables, which allowed the observers to remain a minimum of 20 m away from the snake. Observers watched the live video feed on the laptops until either an interaction with a kangaroo rat occurred or the snake abandoned ambush. Immediately after snake strikes, observers triggered cameras to save the preceding 10 s of footage. We encouraged the aboveground movements of kangaroo rats at our site by sprinkling small amounts of black oil sunflower seed (5–10 g), thereby increasing kangaroo rat foraging activity in the area. Although placing seed increases the foraging movements of kangaroo rats, we do not believe this impacts their ability to perceive and escape snake strikes. In our previous studies of natural encounters between rattlesnakes and kangaroo rats (Clark *et al.*, 2016; Higham *et al.*, 2017; Whitford *et al.*, 2017), we found that kangaroo rats respond to strikes in a similar manner regardless of the presence of supplemental seed in the vicinity. Furthermore, our experimental study of kangaroo rat escape performance (Freymler *et al.*, 2017) found that head position (i.e. down/foraging or up/alert) does not alter kangaroo rat escape kinematics. Owing to the high density of desert kangaroo rats at this field site, most of the kangaroo rats that interacted with snakes were not marked despite intensive trapping

efforts. However, unmarked kangaroo rats are highly likely to be unique individuals, because our recording locations were typically hundreds of metres apart, and desert kangaroo rat home ranges are ~120 m wide (Langley, 1994). After recording of interactions, we calibrated the video frames with a large object of known dimensions (metal rods screwed in place and fixed to a 30 cm × 25 cm metal plate) placed in the space where the strike occurred.

#### VIDEO AND STATISTICAL ANALYSES

All videos were calibrated and digitized in MATLAB (R2016b) using the software DltDataviewer, v.5 (Hedrick, 2008). In order to measure the velocity of the kangaroo rats, we digitized a point on the back of the head in between the ears, then applied a quintic spline to the raw data using the package 'pspline' in RStudio (v.0.99.473). We used a generalized cross-validation smoothing parameter (Walker, 1998) to avoid introducing bias with hand-selected smoothing parameters and to ensure that our results were reproducible. We then took the first derivative of the splined data to obtain velocity. Owing to the high levels of noise in the data and the amplification of noise with each derivative, our field data were not suitable for calculating acceleration values.

We calculated take-off angle as the angle between a point on the foot immediately before toe-off, the back of the head 60 ms after toe-off, and a point on the ground. We chose to use the back of the head instead of the centre of mass because this is a more easily distinguishable landmark on the body, and we chose 60 ms after toe-off instead of the highest point of the jump because kangaroo rats often jumped off screen by the height of the jump. The ground point was placed such that the body of the kangaroo rat was between the snake and the ground point; therefore, jumps away from the snake would have angles < 90°. We then used the coordinates for those points to calculate the three-dimensional jump angle.

We recorded reaction time as the amount of time between the first movement of the strike by the snake and the first movement of the evasion by the kangaroo rat. We also recorded the amount of time the kangaroo rat remained airborne by measuring the amount of time between toe-off and touchdown. Ground contact time was measured as the time between the first visible reaction by the kangaroo rat and toe-off. Given that kangaroo rats often jumped out of the camera view during the highest point of the evasive leap, we calculated jump height using the time spent in air with the following equation:

$$\text{Height (m)} = \frac{[9.81 \text{ ms}^{-2} \times (\text{Time in air (s)}/2)]^2}{2 \times 9.81 \text{ ms}^{-2}}$$

Lastly, we quantified escape trajectory as the angle between the path of the evasion by the kangaroo rat and the strike trajectory in the horizontal plane (i.e. only two dimensions). To do this, we created two vectors: one between the snake's head and the kangaroo rat's head in the frame of first kangaroo rat reaction (strike trajectory), and one between the kangaroo rat's head in the frame of the first reaction and the kangaroo rat's head from either the frame of landing or, if it landed off screen, the last frame in which the kangaroo rat's head was visible (kangaroo rat's evasion). We tested escape trajectory randomness across a 360° circle using a Rao's spacing test of uniformity (Pewsey *et al.*, 2013). All values are reported as the mean  $\pm$  SE.

## RESULTS

We recorded 32 strikes: 15 'hits' (rattlesnakes contacting and biting kangaroo rats) and 17 'misses' (snakes did not physically contact kangaroo rats). Given that the snakes often made contact with the kangaroo rats before toe-off and this contact influenced the movements of the kangaroo rats, we excluded hits from our analyses. We also removed six misses from quantitative analyses for the following reasons. One miss was removed because the cameras moved slightly between the strike and calibration, and therefore we could not make accurate measurements. Two misses were removed because the evasive manoeuvres by the kangaroo rats were so extreme that the body could not be digitized properly. Two additional misses were

removed because the kangaroo rats were not in strike range and did not perform evasive manoeuvres (i.e. snakes struck prematurely and reached maximal extension well short of kangaroo rats). Lastly, one miss was removed because the kangaroo rat immediately jumped off screen, preventing analysis. Thus, we retained 11 misses in our analyses.

Kangaroo rats avoiding snake strikes exhibited a remarkable ability to move their bodies rapidly out of the initial strike trajectories. Reaction times were highly variable and ranged from 38 to 150 ms, with an average of  $81 \pm 8.7$  ms. Mean maximal velocity was  $3.5 \pm 0.2$  m s<sup>-1</sup> (range: 2.7–4.4 m s<sup>-1</sup>) and always occurred within 10 ms of toe-off but was not consistently achieved either before or after toe-off (before toe-off in 45%, after toe-off in 55%). Ground contact time ranged from 28 to 46 ms (average:  $37.8 \pm 2.1$  ms). The leaps of kangaroo rats were typically near-vertical and propelled them high into the air to evade the strikes. Successful kangaroo rat evasions had take-off angles ranging from 56 to 97°, with an average of  $80 \pm 4^\circ$ . Successful evaders also jumped an average of  $0.39 \pm 0.05$  m in the air (range: 0.16–0.82 m) and spent  $0.55 \pm 0.04$  s airborne (range: 0.36–0.82 s). Lastly, kangaroo rats always jumped in a path away from the snake (Fig. 1). Escape trajectory angles varied from 138 to 244°, with an average of 187°. Given that no kangaroo rats ever evaded towards/over the snake in the horizontal plane, the escape trajectory was not random (i.e. not uniformly spread) across 360° ( $U = 221.3, P < 0.001$ ).

Qualitatively, another important aspect of the evasive jump was the high degree of manoeuvrability displayed by most kangaroo rats, consisting of kicks, flips, twists, body contortions and other rapid mid-air movements. Torquing of the body in the air appeared to rely on movements of their long tails (Table 1). We were unable to quantify these aspects of the evasions, however, because many of the points on the kangaroo rats' bodies would frequently go in and out of frame, preventing more detailed three-dimensional motion analysis.

## DISCUSSION

Kangaroo rats that successfully evaded snake strikes exhibited incredible performance, jumping more than six body lengths vertically into the air with an average maximal velocity of more than 27 body lengths s<sup>-1</sup> and reacting 3.5 times faster than the average human response time to visual stimuli (Marshall *et al.*, 1998). Despite the obvious importance of evasive jumping as a predator-avoidance mechanism, there have been surprisingly few studies of the biomechanics of such manoeuvres. Past studies that quantify kangaroo rat and jerboa locomotion have focused mainly on

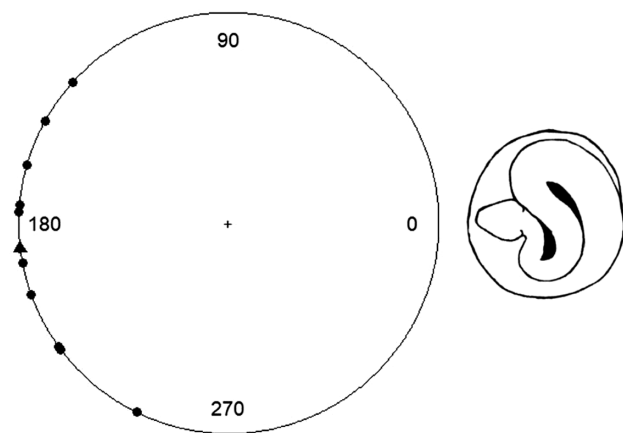

**Figure 1.** Circle plot showing the escape trajectory angles for all 11 kangaroo rats that successfully evaded rattlesnake strikes. Strikes come from 0°, and the escape trajectory angle (in degrees) for each individual kangaroo rat is plotted along the circumference. No individual ever jumped over/towards the snake, which would be expected if escape trajectories were truly protean/random. Triangle shows mean escape trajectory angle.



**Table 1.** Video examples of kangaroo rat evasions

| Description                                                                          | Video link                                                              |
|--------------------------------------------------------------------------------------|-------------------------------------------------------------------------|
| Kangaroo rat uses tail to torque body during jump                                    | <a href="https://youtu.be/aV8_iv6SXqc">https://youtu.be/aV8_iv6SXqc</a> |
| Kangaroo rat uses hindlimbs to kick away snake mid-air during leaps                  | <a href="https://youtu.be/HTjX8YilcJg">https://youtu.be/HTjX8YilcJg</a> |
| Kangaroo rats using mid-air kicks during antagonistic interactions with conspecifics | <a href="https://youtu.be/pPqk3PrFH6E">https://youtu.be/pPqk3PrFH6E</a> |

All videos were filmed at 500 Hz using dual Edgertronic SC-1 cameras.

‘ricochetal’ locomotion (i.e. a series of hops used to move between locations in the environment), rather than the ‘single-shot’ explosive escape jumps used to avoid surprise attacks (but see [Biewener & Blickhan, 1988](#); [Moore \*et al.\*, 2017b](#)).

Although the present study provides the first detailed quantitative analysis of the vertical evasive manoeuvres made by a bipedal rodent during natural predatory attacks, we are aware of several studies in which basic kinematics of escape jumps have been measured in other rodent species. The quadrupedal jumping mouse (*Zapus trinotatus* Rhoads), which exhibits morphological specializations for jumping, is capable of attaining take-off velocities ranging from 1.2 to 3.5 m s<sup>-1</sup> ([Harty & Roberts, 2010](#)). Owing to the high power outputs calculated in the study, these authors found support for the use of elastic energy during jumping. Studies of bipedal rodents [lesser Egyptian jerboas ([Moore \*et al.\*, 2017b](#)), banner-tailed kangaroo rats ([Biewener & Blickhan, 1988](#)) and desert kangaroo rats ([Schwaner \*et al.\*, 2018](#))], however, have not found evidence for power amplification via elastic energy storage; these species rely solely on power production by their enlarged hindlimb muscles during jumps. Because of this, bipedal rodents are capable of faster jumps with higher force production and accelerations. Our team ([Higham \*et al.\*, 2017](#)) estimated the maximal velocity of *Dipodomys merriami* Mearns using the same methodology as used here and found a velocity range of 1.5–4.5 m s<sup>-1</sup>, comparable to the values in the present study of 2.7–4.4 m s<sup>-1</sup>. These comparisons indicate that, although all five species have been shaped by natural selection into specialized jumpers, bipedal rodents show specializations that favour high force and acceleration for faster, more controlled jumps, whereas the quadrupedal jumping mice favour power amplification via elastic mechanisms to compensate for their relatively smaller hindlimb muscle mass.

The remarkable reaction time of kangaroo rats appears to be the crux of their evasion strategy. In [Whitford \*et al.\* \(2019\)](#), we compared various performance variables of both snakes and kangaroo rats that potentially influence the outcome of these interactions and found that kangaroo rat reaction time was the main determinant of whether or not a strike would make contact. Reaction times of kangaroo rats that evaded strikes (i.e. the jumps we analyse here) were typically faster than those of kangaroo rats that were bitten, regardless of the distance between the kangaroo rat and the snake. Thus, the effectiveness of a kangaroo rat escape manoeuvre is largely determined by their ability to initiate a response as rapidly as possible. Interestingly, our estimates of kangaroo rat reactions times to rattlesnake strikes are markedly slower than those we measured in a previous study examining kangaroo rat evasions to an uncoiling metal spring designed to simulate a snake strike ([Freymiller \*et al.\*, 2017](#)). Given that kangaroo rats are likely to rely predominantly on acoustic cues to evade predators ([Webster, 1962](#)), we assume that the noise associated with our simulated strike was different from the noise made by a real rattlesnake strike, owing either to mechanical noise associated with the triggering mechanism or to a difference in the bow wave of air moved towards the kangaroo rat during the forward motion of the device.

#### ESCAPE TRAJECTORY

The optimal escape path for evading a rattlesnake strike is predicted to be a relatively vertical path that is perpendicular to the oncoming strike ([Freymiller \*et al.\*, 2017](#); [Higham \*et al.\*, 2017](#)), which was seen in the present study. Truly protean escape behaviours should result in a random mixture of escape trajectories, including occasional escapes towards predators ([Domenici \*et al.\*, 2011a, b](#)). Although ostensibly riskier than escaping away from a predator, this risk would be mitigated when dealing with ‘single-strike’ predators that cannot launch a second attack quickly; additionally, moving towards a predator gives the predator less time to make major adjustments to the attack path, especially if it is moving quickly and must overcome a higher moment of inertia to manoeuvre ([Shiffman & Eilam, 2004](#)). As such, we expected that kangaroo rats escaping rattlesnakes (a classic example of a rapid, single-strike predator) would have occasional escapes towards the position of the snake. However, we found that in the horizontal plane, kangaroo rat jumps were almost always directed away from the snake and thus were not random. Kangaroo rats do appear to use random, zig-zagging trajectories in the horizontal plane when being chased ([Djawdan & Garland, 1988](#)), suggesting that bipedal rodents

might use different escape trajectories depending on the hunting mode of the predator. The strike path of a viper is inherently limited by the body length of the snake, and we have never observed rattlesnakes to strike more than once when attacking prey in natural conditions (Clark, 2006; Clark *et al.*, 2012, 2016; Putman *et al.*, 2016; Whitford *et al.*, 2017; Whitford *et al.*, 2019), whereas cursorial pursuits often take place over longer distances. Previous studies have also noted that kangaroo rats use rapid vertical leaps to escape owls, another common single-strike predator (Webster, 1962). Thus, movement into the vertical plane is likely to be more important when escaping a single-strike, sit-and-wait ambush predator, whereas unpredictability in the horizontal plane might be more important for escaping pursuit predators.

#### ROLE OF BIPEDALISM IN PREDATOR EVASION

Several studies have found evidence that bipedal rodents are better at predator evasion when compared with their quadrupedal counterparts (Kotler, 1985; Longland & Price, 1991). Conversely, another study found no difference in predation rate between bipedal and quadrupedal rodents (Kotler *et al.*, 1988). Although very limited data exist for comparison, a series of past studies from our group have recorded various species of quadrupedal small mammals jumping away from rattlesnake strikes, including ground squirrels (*Otospermophilus beecheyi* Richardson), gray squirrels (*Sciurus carolinensis* Gmelin), chipmunks (*Tamias striatus* Linnaeus), woodrats (*Neotoma lepida* Thomas), field mice (*Peromyscus* sp.) and voles (*Microtus* sp.) (Clark, 2006; Clark *et al.*, 2012; Putman *et al.*, 2016); qualitatively, the evasive jumps of kangaroo rats are unique among these species.

Kangaroo rats exhibit more forceful jumps that propel individuals much further and faster from snakes, and we have not observed other species exhibit the mid-air kicks and turns used by kangaroo rats (for details of kicking snakes away, see Whitford *et al.*, 2019). Additionally, using an experimental approach, Freymiller *et al.* (2017) found that desert kangaroo rats far outperformed California ground squirrels in the speed and force of their evasive jumps. Thus, we hypothesize that bipedalism and enlarged, powerful muscles provide kangaroo rats with the following unique abilities: (1) to produce rapid, vertical evasions; (2) to narrowly evade capture via extreme levels of manoeuvrability; and (3) to reduce the likelihood of envenomation by kicking away snakes attempting to embed their fangs.

Vipers present a significant risk in desert environments across the globe because they can occur in high abundances (see Nowak *et al.*, 2008) and specialize in killing and consuming small mammals with rapid, envenomating strikes. In order to evade these predators successfully, kangaroo rats used complex, intricate and variable manoeuvres. We found a high degree of variability between leaps in all the factors we measured. Some individuals, for example, jumped almost 90° into the air, whereas others jumped at more acute angles away from the body of the snake. Although we focused on different forms of evasion, studies of jerboa bounding away from pursuit predators also found a high degree of variability in evasions (Moore *et al.*, 2017a). Both kangaroo rats and jerboas execute predominantly muscle-powered leaps; by not having to load tendons for power amplification, these bipedal rodents are capable of performing more rapid and complex manoeuvres (Biewener & Blickhan, 1988; Moore *et al.*, 2017b). When taken together, this evidence supports the idea

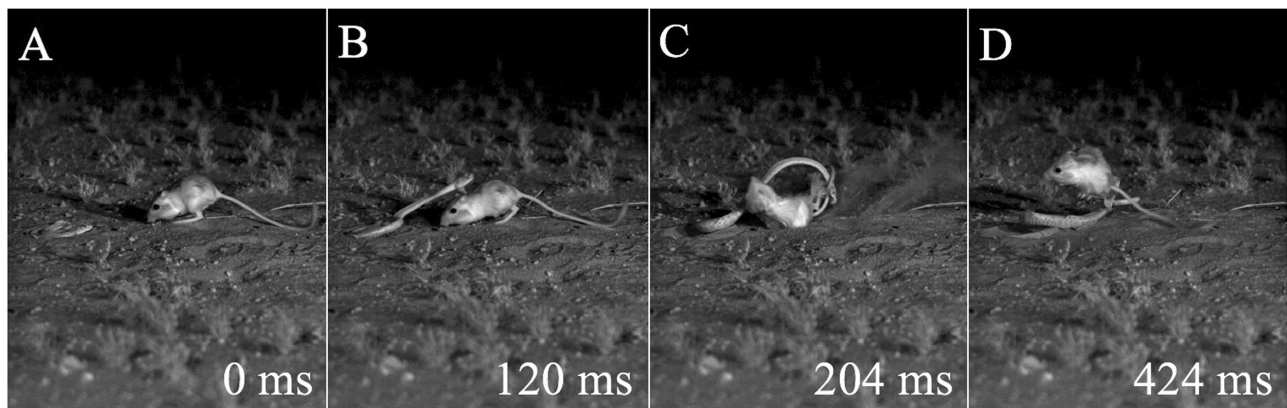

**Figure 2.** Panel of stills showing the extreme manoeuvrability of desert kangaroo rats during evasions from snakes. A, snake initiates strike. B, kangaroo rat begins reaction. C, kangaroo rat flips upside down and kicks snake away. D, kangaroo rat rights self before landing. Time (in milliseconds) is shown in lower right corner of each image, with 0 ms being the moment of strike initiation. Video footage of this interaction is viewable at <https://youtu.be/svz9MPebQRw>.

that powerful and variable jumping to evade predators makes bipedal rodents more difficult to capture and is a key reason why this unique morphology has evolved independently multiple times in desert rodents.

Although our video set-up was not sufficient for accurately quantifying manoeuvrability during these evasions, we observed many kangaroo rats narrowly evade the strikes by quickly moving different parts of their bodies out of the strike path. For example, one kangaroo rat rotated its body upside down, kicked the snake's head away from its body, then righted itself before bounding away (Fig. 2). All our evasion sequences exhibited unique elements, underscoring the high degree of manoeuvrability and acrobatics used to avoid snake strikes. Analyses of these complex manoeuvres will be undertaken in the future with a larger number of synchronized cameras to allow for a more intricate examination of the remarkable manoeuvrability of these rodents. From the qualitative observations, we noted that much of this manoeuvrability may also stem from their specialized morphology. Given that they were still at risk from being hit after initiating the jump (see Whitford *et al.*, 2019), individuals would frequently rotate and twist their bodies in mid-air, potentially with the aid of their long tail (Table 1). Lastly, we observed the kangaroo rats using their large hindlimbs physically to kick the snakes away from their bodies and prevent envenomation (Table 1). It is also worth noting that bipedal jumping and kicking may be crucial for other facets of kangaroo rat life history (Bartholomew & Caswell, 1951; Eisenberg, 1963; Kenagy, 1976); anecdotal recordings of intraspecific interactions that we recorded opportunistically show that jumping and kicking play central roles in antagonistic encounters (Table 1).

#### CONCLUSION

This study is the first, to our knowledge, to describe the kinematics of evasive leaps by bipedal rodents avoiding real attacks from predators. In order to evade rattlesnakes successfully, kangaroo rats combine highly enhanced auditory senses with morphological specializations for jumping and kicking, resulting in remarkable levels of physical performance in natural escape manoeuvres. Laboratory-based studies of bipedal rodents have elucidated the relative importance of various muscles and tendons for jumping, and they provide a framework for understanding why bipedalism has evolved several times in desert rodents. Taking these studies into the field (an 'ecomechanical' approach) further underscores the importance of predator evasion in the evolution of bipedalism in small desert mammals.

#### ACKNOWLEDGEMENTS

We would like to thank Jessica Ryan, Drew Steele, Katherine Phillips and Colin Goodman for their assistance and dedication during data collection. We would also like to thank the Marine Corps Air Station, Yuma and Abigail Rosenberg for providing us with access to the Barry M. Goldwater Range; we appreciate the opportunity to work in habitat that has been maintained and preserved by the United States Marine Corps. We thank two anonymous reviewers for their valuable feedback on earlier versions of this manuscript. Lastly, we thank San Diego State University, the Animal Behavior Society and the American Society of Mammalogists for financial support to carry out this work.

#### REFERENCES

- Alexander RM. 1982. *Locomotion of animals*. London: Blackie & Son Limited.
- Arnold SJ. 1983. Morphology, performance, and fitness. *American Zoologist* **23**: 347–361.
- Bartholomew GA, Jr., Caswell HH, Jr. 1951. Locomotion in kangaroo rats and its adaptive significance. *Journal of Mammalogy* **32**: 155–169.
- Biewener AA, Blickhan R. 1988. Kangaroo rat locomotion: design for elastic energy storage or acceleration? *The Journal of Experimental Biology* **140**: 243–255.
- Clark RW. 2006. Post-strike behavior of timber rattlesnakes (*Crotalus horridus*) during natural predation events. *Ethology* **112**: 1089–1094.
- Clark RW, Dorr SW, Whitford MD, Freymiller GA, Putman BJ. 2016. Activity cycles and foraging behaviors of free-ranging sidewinder rattlesnakes (*Crotalus cerastes*): the ontogeny of hunting in a precocial vertebrate. *Zoology* **119**: 196–206.
- Clark RW, Tangco S, Barbour MA. 2012. Field video recordings reveal factors influencing predatory strike success of free-ranging rattlesnakes (*Crotalus* spp.). *Animal Behaviour* **84**: 183–190.
- Combes SA, Rundle DE, Iwasaki JM, Crall JD. 2012. Linking biomechanics and ecology through predator–prey interactions: flight performance of dragonflies and their prey. *The Journal of Experimental Biology* **215**: 903–913.
- Dayton GH, Saenz D, Baum KA, Langerhans RB, DeWitt TJ. 2005. Body shape, burst speed and escape behavior of larval anurans. *Oikos* **111**: 582–591.
- Djawdan M, Garland, T, Jr. 1988. Coexistence of bipedal and quadrupedal rodents: relevance of maximal running speeds. *Journal of Mammalogy* **69**: 765–772.
- Domenici P, Blagburn JM, Bacon JP. 2011a. Animal escapology I: theoretical issues and emerging trends in escape trajectories. *Journal of Experimental Biology* **214**: 2463–2473.



- Domenici P, Blagburn JM, Bacon JP. 2011b.** Animal escapology II: escape trajectory case studies. *Journal of Experimental Biology* **214**: 2474–2494.
- Domenici P, Blake R. 1997.** The kinematics and performance of fish fast-start swimming. *The Journal of Experimental Biology* **200**: 1165–1178.
- Domenici P, Turesson H, Brodersen J, Brönmark C. 2008.** Predator-induced morphology enhances escape locomotion in crucian carp. *Proceedings of the Royal Society B: Biological Sciences* **275**: 195–201.
- Eisenberg JF. 1963.** *The behavior of heteromyid rodents*. Oakland: University of California Press.
- Freymler GA, Whitford MD, Higham TE, Clark RW. 2017.** Recent interactions with snakes enhance escape performance of desert kangaroo rats (Rodentia: Heteromyidae) during simulated attacks. *Biological Journal of the Linnean Society* **122**: 651–660.
- Harty TH, Roberts TJ. 2010.** *Jump energetics and elastic mechanisms in the Pacific jumping mouse (Zapus trinotatus)*. Unpublished D. Phil. Thesis, Oregon State University.
- Hedrick TL. 2008.** Software techniques for two- and three-dimensional kinematic measurements of biological and biomimetic systems. *Bioinspiration & Biomimetics* **3**: 034001.
- Hertz PE, Huey RB, Garland T, Jr. 1988.** Time budgets, thermoregulation, and maximal locomotor performance: are reptiles Olympians or boy scouts? *Integrative and Comparative Biology* **28**: 927–938.
- Higham TE, Clark RW, Collins CE, Whitford MD, Freymiller GA. 2017.** Rattlesnakes are extremely fast and variable when striking at kangaroo rats in nature: three-dimensional high-speed kinematics at night. *Scientific Reports* **7**: 40412.
- Husak JF. 2006.** Does survival depend on how fast you can run or how fast you do run? *Functional Ecology* **20**: 1080–1086.
- Irschick DJ, Garland T, Jr. 2001.** Integrating function and ecology in studies of adaptation: investigations of locomotor capacity as a model system. *Annual Review of Ecology and Systematics* **32**: 367–396.
- Irschick DJ, Losos JB. 1998.** A comparative analysis of the ecological significance of maximal locomotor performance in Caribbean *Anolis* lizards. *Evolution* **52**: 219–226.
- Jacobs GA. 1995.** Detection and analysis of air currents by crickets. *BioScience* **45**: 776–785.
- Kenagy GJ. 1976.** Field observations of male fighting, drumming, and copulation in the Great Basin kangaroo rat, *Dipodomys microps*. *Journal of Mammalogy* **57**: 781–785.
- Kotler BP. 1985.** Owl predation on desert rodents which differ in morphology and behavior. *Journal of Mammalogy* **66**: 824–828.
- Kotler BP, Brown JS, Smith RJ, Wirtz, WO, II. 1988.** The effects of morphology and body size on rates of owl predation on desert rodents. *Oikos* **53**: 145–152.
- Langley CM. 1994.** Spatial memory in the desert kangaroo rat (*Dipodomys deserti*). *Journal of Comparative Psychology* **108**: 3–14.
- Longland WS, Price MV. 1991.** Direct observations of owls and heteromyid rodents: can predation explain microhabitat use? *Ecology* **72**: 2261–2274.
- Malusa J, Sundt P. 2015.** *Vegetation of the Barry M. Goldwater Range West, Marine Corps Air Station—Yuma, Arizona. Report submitted to USMC under Cooperative Agreement DACA87-05-H-0018*, doi: 10.13140/RG.2.1.2058.7681
- Marshall R, Ming C, Withington DJ, Turner DL. 1998.** Visual cues initiate different latency reaction times in finger and respiratory-related motor responses in humans. *The Journal of Physiology* **511**: 102–103.
- McGowan CP, Collins CE. 2018.** Why do mammals hop? Understanding the ecology, biomechanics and evolution of bipedal hopping. *The Journal of Experimental Biology* **221**: jeb161661.
- Moore TY, Cooper KL, Biewener AA, Vasudevan R. 2017a.** Unpredictability of escape trajectory explains predator evasion ability and microhabitat preference of desert rodents. *Nature Communications* **8**: 440.
- Moore TY, Rivera AM, Biewener AA. 2017b.** Vertical leaping mechanics of the lesser Egyptian jerboa reveal specialization for maneuverability rather than elastic energy storage. *Frontiers in Zoology* **14**: 32.
- Nowak EM, Theimer TC, Schuett GW. 2008.** Functional and numerical responses of predators: where do vipers fit in the traditional paradigms? *Biological Reviews of the Cambridge Philosophical Society* **83**: 601–620.
- Pewsey A, Neuhäuser M, Ruxton GD. 2013.** *Circular statistics in R*. Oxford: Oxford University Press.
- Putman BJ, Barbour MA, Clark RW. 2016.** Foraging behavior of free-ranging rattlesnakes (*Crotalus oreganus*) in California ground squirrel (*Otospermophilus beecheyi*) colonies. *Herpetologica* **72**: 55–63.
- Reinert HK, Cundall D. 1982.** An improved surgical implantation method for radio-tracking snakes. *Copeia* **1982**: 702–705.
- Schwaneer MJ, Lin DC, McGowan CP. 2018.** Jumping mechanics of desert kangaroo rats. *The Journal of Experimental Biology* **221**: jeb186700.
- Shiffman E, Eilam D. 2004.** Movement and direction of movement of a simulated prey affect the success rate in barn owl (*Tyto alba*) attack. *Journal of Avian Biology* **35**: 111–116.
- Taylor CR, Heglund NC, McMahon TA, Looney TR. 1980.** Energetic cost of generating muscular force during running: a comparison of large and small animals. *Journal of Experimental Biology* **86**: 9–18.
- Walker JA. 1998.** Estimating velocities and accelerations of animal locomotion: a simulation experiment comparing numerical differentiation algorithms. *Journal of Experimental Biology* **201**: 981–995.
- Webster DB. 1962.** A function of the enlarged middle-ear cavities of the kangaroo rat, *Dipodomys*. *Physiological Zoology* **35**: 248–255.
- Webster DB, Webster M. 1971.** Adaptive value of hearing and vision in kangaroo rat predator avoidance. *Brain, Behavior and Evolution* **4**: 310–322.
- Whitford MD, Freymiller GA, Clark RW. 2017.** Avoiding the serpent's tooth: predator–prey interactions between free-ranging sidewinder rattlesnakes and desert kangaroo rats. *Animal Behaviour* **130**: 73–78.



**Whitford MD, Freymiller GA, Higham TE, Clark RW. 2019.** Determinants of predation success: how to survive an attack from a rattlesnake. *Functional Ecology*. doi:10.1111/1365-2435.13318

**Wilson AM, Hubel TY, Wilshin SD, Lowe JC, Lorenc M, Dewhirst OP, Bartlam-Brooks HLA, Diack R, Bennitt E, Golabek KA, Woledge RC, McNutt JW, Curtin NA,**

**West TG. 2018.** Biomechanics of predator-prey arms race in lion, zebra, cheetah, and impala. *Nature* **554**: 183–188.

**Wynn ML, Clemente C, Nasir AF, Wilson RS. 2015.** Running faster causes disaster: trade-offs between speed, manoeuvrability and motor control when running around corners in northern quolls (*Dasyurus hallucatus*). *The Journal of Experimental Biology* **218**: 433–439.
